# Supplementary material
Source: Springer Nature journal article supplement (https://www.springermedizin.de/resource/supplementary/13054_2010_8855_MOESM4_ESM.pdf/9732766)

Microvascular flow index of small vessels  
(Increase relative to baseline)

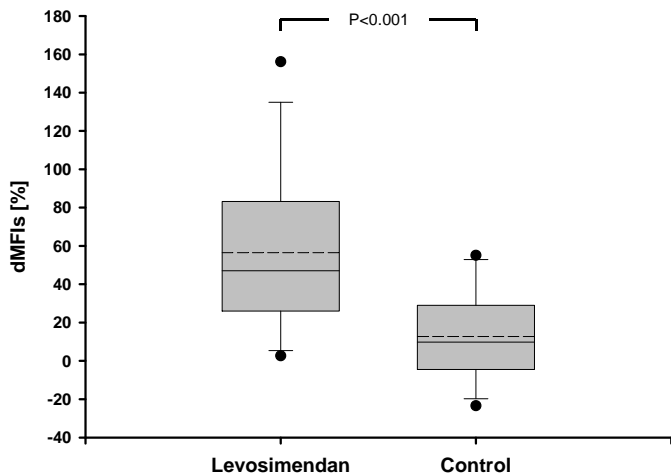

Microvascular flow index of medium vessels  
(Increase relative to baseline)

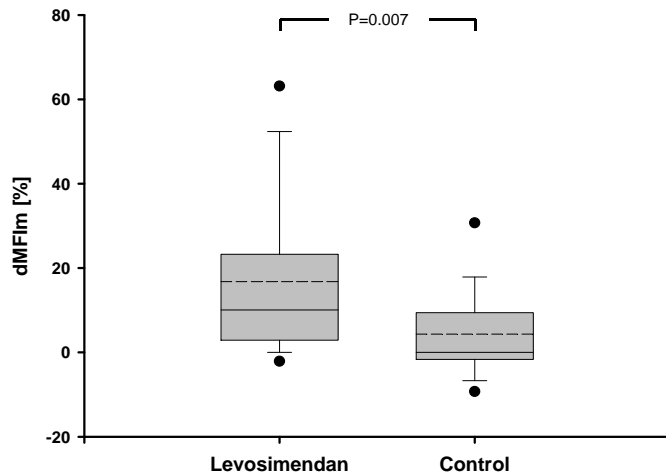

Vessel density  
(Increase relative from baseline)

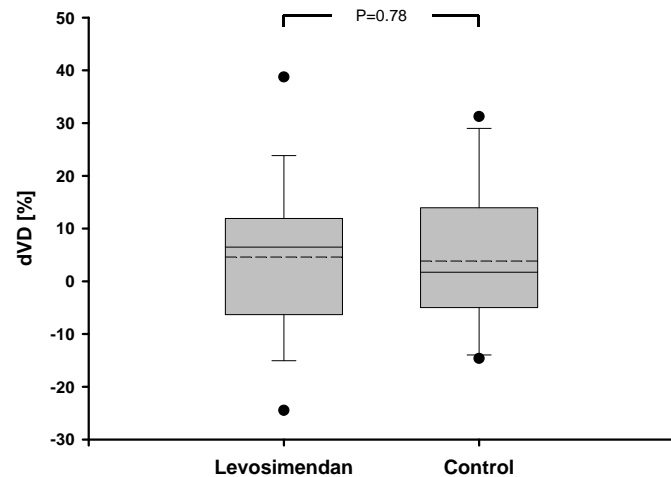

Perfused vessel density  
(Increase relative to baseline)

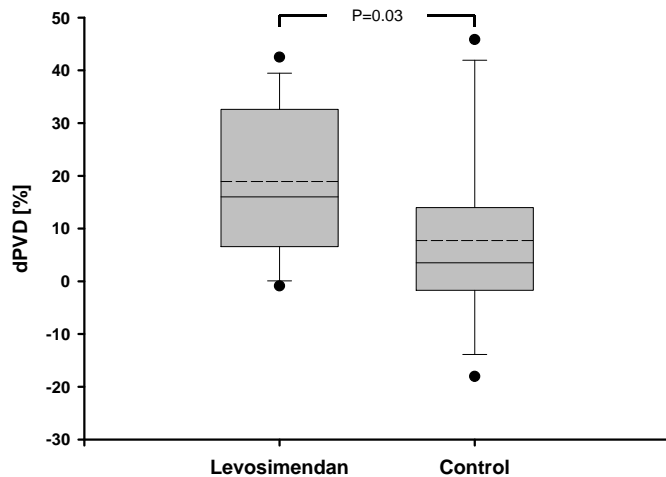

De Backer score  
(Increase relative to baseline)

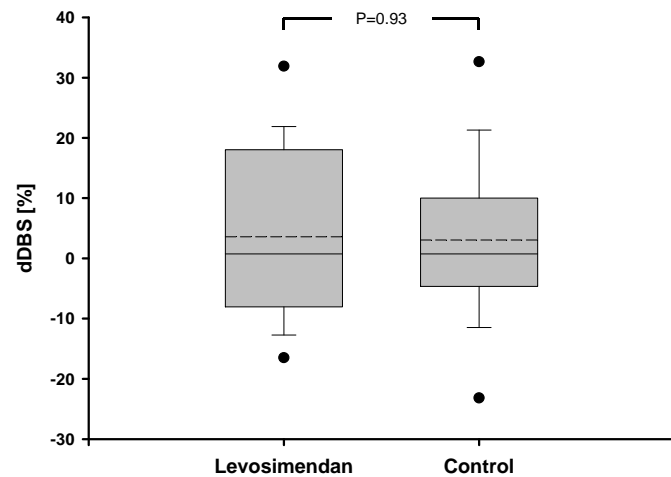

Heterogeneity index  
(Increase relative to baseline)

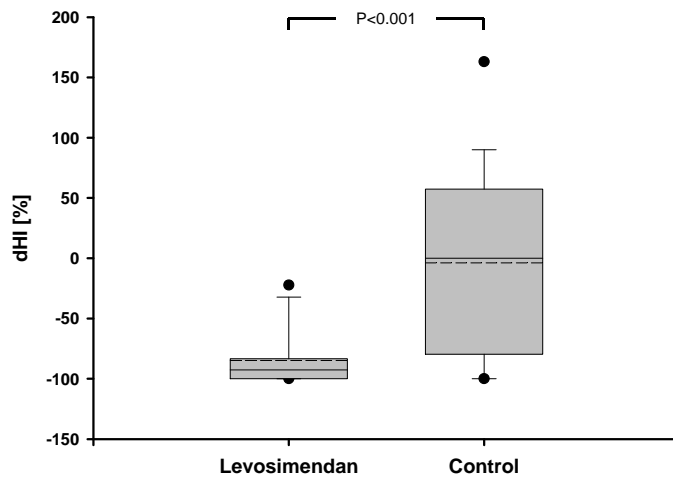

Supplement: MOESM4 [file 9732766]
